# Supplementary material
Source: Research Square preprint supplement (doi:10.21203/rs.3.rs-9004253/v1)
Supplement: Supplementary file 1 [file ed2b0cebcf8180a1654e336b.docx]

Supplementary material

**TABLE S1. GENERAL HEALTH: BIVARIATE ANALYSIS**

| **GENERAL HEALTH** | ***β* coefficient** | **95% CI** | ***p value*** |
| --- | --- | --- | --- |
| Age | 0,15 | -0,05 to 0,34 | *0.13* |
| Gender (female) | -23.38 | -45,31 to -1,44 | *0.04* |
| Time of evolution of the disease in years | -0.44 | -0,83 to -0,05 | *0.03* |
| **Occupation**  Unemployed  Professional  Student  Teacher  Merchant  Administrative employee  Housewife  Craft  Others / retirees | 33.54  18.36  22.79  9.3  20.77  14.85  16.86  11.99  11.00 | 21,42 to 45,66  3,93 to 32,80  -5.19 to 50,78  -7.16 to 25,95  3,63 to 37,91  -0,31 to 30,01  3,92 to 29,81  -3,43 to 27,40  -4,28 to 26,29 | *<0.01*  *0.01*  *0.11*  *0.27*  *0.02*  *0.06*  *0.01*  *0.13*  *0.16* |
| Xerophthalmia | -0.19 | -0,28 to -0,10 | <0.01 |
| Xerostomia | -0.23 | -0,32 to -0,15 | <0.01 |
| Xeroderma | -0.20 | -0,29 to -0,12 | <0.01 |
| Xerovagina | -0.11 | -0,19 to -0,03 | <0.01 |
| Fatigue | -0.27 | -0,35 to -0,19 | <0.01 |
| Parotid swealling | -7.60 | -14,91 to -0,28 | 0.04 |
| Arthralgia | -9.94 | -15,57 to -4,31 | <0.01 |
| Arthritis | -8.41 | -16,48 to -0,34 | 0.04 |
| Myalgias | -8.33 | -15,52 to -1,14 | 0.02 |
| Raynaud´s phenomenom | -4.14 | -12,08 to 3,79 | 0.31 |
| Polineuropathy | -3.86 | -14,50 to 6,77 | 0.46 |
| Cutaneus vasculitis | -12.97 | -29,87 to 3,92 | 0.13 |
| Pulmonary manifestations | -0.58 | -11.92 to 10,76 | 0.92 |
| Renal manifestations | 10.88 | -4.02 to 25,78 | 0.15 |
| Anemia of chronic disease | -3.17 | -13,06 to 6,72 | 0.53 |
| Neutropenia | 11.05 | -33,30 to 55,39 | 0.62 |
| Lymphoma | -13.91 | -58,16 to 30,34 | 0.54 |
| Fibromyalgia | -15.95 | -22,60 to -9,31 | <0.01 |
| Osteoarthritis | 1.43 | -4,57 to 7,44 | 0.64 |
| Tobacco | 7.12 | 0,96 to 13,28 | 0.02 |
| High blood pressure | 0.35 | -5,51 to 6,22 | 0.91 |
| Artificial tears | -7.01 | -15,44 to 1,42 | 0.10 |
| Ophthalmic gel | -5.52 | -10,96 to -0,09 | 0.05 |
| Saliva substitute | -6.27 | -13,13 to 0,59 | 0.07 |
| Secretagogues | 3.56 | -3,78 to 10,90 | 0.34 |
| Hydroxychloroquine | 2.41 | -3,46 to 8,28 | 0.42 |
| Immunosuppressants | -0.63 | -8,20 to 6,93 | 0,87 |
| Depression  Absent  Mild  Moderate  Moderately severe  Severe | 64.68  -14.41  -24.83  -29.26  -36.51 | 60,52 to 68,84  -20,75 to -8,07  -31,57 to -18,09  -36,67 to -21,86  -46,12 to -26,91 | <0.01  <0.01  <0.01  <0.01  <0.01 |
| Anxiety  Absent  Mild  Moderate  Severe | 63.64  -18.48  -22.58  -30.14 | 59,51 to 67,77  -24,65 to -12,32  -29,39 to -15,77  -37,74 to -22,54 | <0,01  <0,01  <0,01  <0,01 |
| Physical activity | 0.00007 | -0,00001 to 0,0002 | 0.10 |

**TABLE S2. PHYSICAL ROLE : BIVARIATE ANALYSIS**

| **PHYSICAL ROLE** | ***β* coefficient** | **95% CI** | ***p value*** |
| --- | --- | --- | --- |
| Age | -0.55 | -0.92 to -0.18 | <0.01 |
| Gender (female) | -26.36 | -68.63 to 15.90 | 0.22 |
| Time of evolution of the disease in years | -0.88 | -1.62 to -0.14 | 0.02 |
| **Occupation**  Unemployed  Professional  Student  Teacher  Merchant  Administrative employee  Housewife  Craft  Others / retirees | 19.23  38.03  64.10  35.77  26.92  37.29  20.93  9.18  13.72 | -3,67 to 42.13  10.75 to 65.31  11.22 to 116.99  4.48 to 67.06  -5.46 to 59.31  8.64 to 65.94  -3.50 to 45.36  -19.71 to 38.06  -15.16 to 42.61 | 0.1  <0.01  0.02  0.03  0.10  0.01  0.09  0.53  0.35 |
| Xerophthalmia | -0.40 | -0.57 to -0.23 | <0.01 |
| Xerostomia | -0.41 | -0.58 to -0.25 | <0.01 |
| Xeroderma | -0.52 | -0.68 to -0.36 | <0.01 |
| Xerovagina | -0.18 | -0.33 to -0.03 | 0.02 |
| Fatigue | -0.59 | -0.73 to -0.44 | <0.01 |
| Parotid swealling | 0.03 | -14.06 to 14.13 | 0.996 |
| Arthralgia | -19.00 | -29.72 to -8.29 | <0.01 |
| Arthritis | -25.09 | -40.38 to -9.81 | <0.01 |
| Myalgias | -13.84 | -27.77 to 0.08 | 0.05 |
| Raynaud´s phenomenom | -4.86 | -19.96 to 10.24 | 0.53 |
| Polineuropathy | -16.73 | -36.89 to 3.43 | 0.10 |
| Cutaneus vasculitis | -20.02 | -50.27 to 10.23 | 0.19 |
| Pulmonary manifestations | -17.11 | -38.79 to 4.58 | 0.12 |
| Renal manifestations | 9.47 | -19.10 to 38.05 | 0.51 |
| Anemia of chronic disease | -10.86 | -29.64 to 7.92 | 0.26 |
| Neutropenia | 6.30 | -78.15 to 90.76 | 0.88 |
| Lymphoma | -44.17 | -128.39 to 40.04 | 0.30 |
| Fibromyalgia | -36.00 | -48.48 to -23.53 | <0.01 |
| Osteoarthritis | -13.34 | -24.58 to -2.09 | 0.02 |
| Tobacco | 2.47 | -9.25 to 14.19 | 0.68 |
| High blood pressure | -13.68 | -24.50 to -2.86 | 0.01 |
| Artificial tears | -6.81 | -23.00 to 9.37 | 0.41 |
| Ophthalmic gel | -3.98 | -14.50 to 6.54 | 0.46 |
| Saliva substitute | -17.60 | -30.40 to -4.79 | <0.01 |
| Secretagogues | 3.81 | -10.24 a 17.86 | 0.60 |
| Hydroxychloroquine | 12.27 | 1.16 a 23.39 | 0.03 |
| Immunosuppressants | -2.67 | -17.10 to 11.75 | 0.72 |
| Depression  Absent  Mild  Moderate  Moderately severe  Severe | 72.78  -29.14  -43.19  -55.42  -70.01 | 64.78 to 80.79  -41.38 to -16.90  -56.13 to -30.26  -69.73 to -41.12  -88.59 to -51.43 | <0.01  <0.01  <0.01  <0.01  <0.01 |
| Anxiety  Absent  Mild  Moderate  Severe | 64.08  -26.05  -30.08  -43.94 | 55.66 to 72.50  -38.61 to -13.49  -44.01 to -16.14  -59.50 to -28.38 | <0.01  <0.01  <0.01  <0.01 |
| Physical activity | 0.0001 | -0.00004 to 0.0003 | 0.12 |

**TABLE S3. BODILY PAIN: BIVARIATE ANALYSIS**

| **BODILY PAIN** | ***β* coefficient** | **95% CI** | ***p value*** |
| --- | --- | --- | --- |
| Age | -0.21 | -0.44 to 0.02 | 0.07 |
| Gender (female) | 0.39 | -25.39 to 26.17 | 0.98 |
| Time of evolution of the disease in years | -0.48 | -0.93 to -0.03 | 0.04 |
| **Occupation**  Unemployed  Professional  Student  Teacher  Merchant  Administrative employee  Housewife  Craft  Others / retirees | 29.77  32.13  36.23  34.30  26.00  27.05  20.52  18.78  22.64 | 16.04 to 43.50  15.69 to 48.57  4.52 to 67.94  15.54 to 53.06  6.58 to 45.42  9.73 to 44.37  5.87 to 35.17  1.46 to 36.10  5.32 to 39.96 | <0.01  <0.01  0.03  <0.01  <0.01  <0.01  <0.01  0.03  0.01 |
| Xerophthalmia | -0.24 | -0.34 to -0.13 | <0.01 |
| Xerostomia | -0.31 | -0.41 to -0.22 | <0.01 |
| Xeroderma | -0.33 | -0.43 to -0.24 | <0.01 |
| Xerovagina | -0.18 | -0.27 to -0.09 | <0.01 |
| Fatigue | -0.35 | -0.44 to -0.27 | <0.01 |
| Parotid swealling | -4.42 | -12.95 to 4.10 | 0.31 |
| Arthralgia | -15.89 | -22.18 to -9.60 | <0.01 |
| Arthritis | -17.55 | -26.71 to -8.39 | <0.01 |
| Myalgias | -12.42 | -20.80 to -4.05 | <0.01 |
| Raynaud´s phenomenom | -5.48 | -14.53 to 3.56 | 0.23 |
| Polineuropathy | -17.85 | -29.76 to -5.93 | <0.01 |
| Cutaneus vasculitis | -14 | -32.25 to 4.25 | 0.13 |
| Pulmonary manifestations | -5.00 | -18.13 to 8.13 | 0.45 |
| Renal manifestations | 10.57 | -6.67 to 27.81 | 0.23 |
| Anemia of chronic disease | -1.91 | -13.31 to 9.49 | 0.74 |
| Neutropenia | -2.87 | -53.40 to 47.66 | 0.91 |
| Lymphoma | 8.42 | -42.30 to 59.14 | 0.74 |
| Fibromyalgia | -26.39 | -33.71 to -19.06 | <0.01 |
| Osteoarthritis | -7.85 | -14.65 to -1.05 | 0.02 |
| Tobacco | 1.04 | -6.15 to 8.22 | 0.78 |
| High blood pressure | -8.76 | -15.37 to -2.14 | 0.01 |
| Artificial tears | 0.07 | -9.83 to 9.98 | 0.99 |
| Ophthalmic gel | -4.06 | -10.39 to 2.28 | 0.21 |
| Saliva substitute | -5.63 | -13.46 to 2.21 | 0.16 |
| Secretagogues | 5.70 | -2.84 to 14.24 | 0.19 |
| Hydroxychloroquine | 3.31 | -3.44 to 10.07 | 0.34 |
| Immunosuppressants | 1.25 | -7.46 to 9.96 | 0.78 |
| Depression  Absent  Mild  Moderate  Moderately severe  Severe | 72.10  -13.95  -29.67  -41.60  -70.00 | 67.45 to 76.76  -21.05 to -6.85  -37.17 to -22.18  -47.16 to -30.42  -52.36 to -30.85 | <0.01  <0.01  <0.01  <0.01  <0.01 |
| Anxiety  Absent  Mild  Moderate  Severe | 68.86  -15.69  -26.44  -35.29 | 64.07 to 73.65  -22.81 to -8.57  -34.34 to -18.54  -44.19 to -26.39 | <0.01  <0.01  <0.01  <0.01 |
| Physical activity | 0.0001 | -8.77 to 0.0002 | 0.05 |

**TABLE S4. VITALITY: BIVARIATE ANALYSIS**

| **VITALITY** | ***β* coefficient** | **95% CI** | ***p value*** |
| --- | --- | --- | --- |
| Age | -0.08 | -0.28 to 0.11 | 0.40 |
| Gender (female) | -10.72 | -31.48 to 10.05 | 0.31 |
| Time of evolution of the disease in years | -0.28 | -0.65 to 0.10 | 0.14 |
| **Occupation**  Unemployed  Professional  Student  Teacher  Merchant  Administrative employee  Housewife  Craft  Others / retirees | 31.67  16.17  23.33  14.00  12.18  19.70  14.87  12.38  12.65 | 19.62 to 43.71  1.91 to 30.42  -3.60 to 50.27  -2.16 to 30.16  -4.53 to 28.89  4.72 to 34.67  2.06 to 27.69  -2.72 to 27.48  -2.32 to 27.63 | <0.01  0.03  0.09  0.09  0.15  0.10  0.02  0.11  0.10 |
| Xerophthalmia | -0.19 | -0.28 to -0.11 | <0.01 |
| Xerostomia | -0.22 | -0.30 to -0.14 | <0.01 |
| Xeroderma | -0.24 | -0.32 to -0.17 | <0.01 |
| Xerovagina | -0.15 | -0.22 to -0.07 | <0.01 |
| Fatigue | -0.37 | -0.44 to -0.31 | <0.01 |
| Parotid swealling | 1.29 | -5.80 to 8.37 | 0.72 |
| Arthralgia | -10.43 | -15.76 to -5.11 | <0.01 |
| Arthritis | -12.47 | -20.32 to -4.62 | <0.01 |
| Myalgias | -10.12 | -16.93 to -3.31 | <0.01 |
| Raynaud´s phenomenom | -2.65 | -10.36 to 5.07 | 0.50 |
| Polineuropathy | -10.63 | -20.54 to -0.72 | 0.04 |
| Cutaneus vasculitis | -5.61 | -21.54 to 10.32 | 0.49 |
| Pulmonary manifestations | -3.95 | -14.76 to 6.86 | 0.47 |
| Renal manifestations | 16.53 | 2.53 to 30.53 | 0.02 |
| Anemia of chronic disease | -7.77 | -17.20 to 1.65 | 0.11 |
| Neutropenia | -16.50 | -57.88 to 24.87 | 0.43 |
| Lymphoma | -16.36 | -57.75 to 25.03 | 0.44 |
| Fibromyalgia | -21.32 | -27.30 to -15.34 | <0.01 |
| Osteoarthritis | -4.69 | -10.42 to 1.04 | 0.11 |
| Tobacco | 3.26 | -2.65 to 9.17 | 0.28 |
| High blood pressure | -3.58 | -9.15 to 2.00 | 0.21 |
| Artificial tears | -6.11 | -14.28 to 2.06 | 0.14 |
| Ophthalmic gel | -1.20 | -6.43 to 4.04 | 0.65 |
| Saliva substitute | -6.15 | -12.54 to 0.23 | 0.06 |
| Secretagogues | 3.65 | -3.29 to 10.60 | 0.30 |
| Hydroxychloroquine | 1.62 | -3.93 to 7.17 | 0.57 |
| Immunosuppressants | -0.34 | -7.66 to 6.98 | 0.93 |
| Depression  Absent  Mild  Moderate  Moderately severe  Severe | 64.37  -17.73  -28.69  -34.66  -43.26 | 61.08 to 67.65  -22.78 to -12.68  -34.18 to -23.19  -40.65 to -28.67  -50.88 to -35.63 | <0.01  <0.01  <0.01  <0.01  <0.01 |
| Anxiety  Absent  Mild  Moderate  Severe | 60.18  -16.03  -25.91  -28.96 | 56.45 to 63.90  -21.58 to -10.49  -32.11 to -19.70  -36.01 to -21.92 | <0.01  <0.01  <0.01  <0.01 |
| Physical activity | 0.0001 | 0.00004 a 0.0002 | <0.01 |

**TABLE S5. SOCIAL FUNCTION: BIVARIATE ANALYSIS**

| **SOCIAL FUNCTION** | ***β* coefficient** | **95% CI** | ***p value*** |
| --- | --- | --- | --- |
| Age | -0.31 | -0.55 to -0.07 | 0.01 |
| Gender (female) | -23.06 | -50.08 to 3.97 | 0.09 |
| Time of evolution of the disease in years | -0.17 | -0.65 to 0.30 | 0.47 |
| **Occupation**  Unemployed  Professional  Student  Teacher  Merchant  Administrative employee  Housewife  Craft  Others / retirees | 42.31  27.85  28.53  31.03  24.04  25.63  17.40  19.62  12.81 | 27.56 to 57.05  10.28 to 45.42  -5.53 to 62.58  10.88 to 51.17  3.18 to 44.89  7.18 to 44.08  1.67 to 33.13  1.02 to 38.22  -5.79 to 31.41 | <0.01  <0.01  0.10  <0.01  0.02  <0.01  0.03  0.04  0.18 |
| Xerophthalmia | -0.18 | -0.30 to -0.07 | <0.01 |
| Xerostomia | -0.31 | -0.42 to -0.20 | <0.01 |
| Xeroderma | -0.30 | -0.40 to -0.19 | <0.01 |
| Xerovagina | -0.17 | -0.27 to -0.08 | <0.01 |
| Fatigue | -0.37 | -0.46 to -0.27 | <0.01 |
| Parotid swealling | -4.72 | -13.77 to 4.33 | 0.31 |
| Arthralgia | -11.53 | -18.43 to -4.63 | <0.01 |
| Arthritis | -13.68 | -23.52 to -3.84 | <0.01 |
| Myalgias | -13.07 | -21.91 to -4.23 | <0.01 |
| Raynaud´s phenomenom | -6.50 | -16.15 to 3.16 | 0.19 |
| Polineuropathy | -11.89 | -24.83 to 1.06 | 0.07 |
| Cutaneus vasculitis | -6.14 | -25.64 to 13.36 | 0.54 |
| Pulmonary manifestations | -3.42 | -17.44 to 10.61 | 0.63 |
| Renal manifestations | 21.67 | 3.62 to 39.72 | 0.02 |
| Anemia of chronic disease | -9.23 | -21.21 to 2.76 | 0.13 |
| Neutropenia | -25.37 | -78.77 to 28.03 | 0.35 |
| Lymphoma | -12.45 | -66.25 to 41.36 | 0.65 |
| Fibromyalgia | -28.59 | -36.29 to -20.89 | <0.01 |
| Osteoarthritis | -6.53 | -13.79 to 0.72 | 0.08 |
| Tobacco | 3.07 | -4.50 to 10.63 | 0.43 |
| High blood pressure | -6.78 | -13.74 to 0.18 | 0.06 |
| Artificial tears | -1.34 | -11.73 to 9.04 | 0.80 |
| Ophthalmic gel | -2.65 | -9.38 to 4.07 | 0.44 |
| Saliva substitute | -9.13 | -17.36 to -0.90 | 0.03 |
| Secretagogues | 3.15 | -5.86 to 12.16 | 0.49 |
| Hydroxychloroquine | 7.09 | -0.05 to 14.22 | 0.05 |
| Immunosuppressants | 0.15 | -9.10 to 9.40 | 0.97 |
| Depression  Absent  Mild  Moderate  Moderately severe  Severe | 83.81  -11.78  -33.30  -48.40  -60.20 | 79.73 to 87.90  -18.00 to -5.56  -39.88 to -26.73  -55.66 to -41.13  -69.63 to -50.78 | <0.01  <0.01  <0.01  <0.01  <0.01 |
| Anxiety  Absent  Mild  Moderate  Severe | 81.98  -20.00  -29.98  -49.69 | 77.41 to 86.55  -26.80 to -13.21  -37.52 to -22.44  -58.10 to -41.27 | <0.01  <0.01  <0.01  <0.01 |
| Physical activity | 0.00008 | -0.00003 to 0.0002 | 0.17 |

**TABLE S6. MENTAL HEALTH: BIVARIATE ANALYSIS**

| **MENTAL HEALTH** | ***β* coefficient** | **95% CI** | ***p value*** |
| --- | --- | --- | --- |
| Age | -0.14 | -0.33 to 0.06 | 0.17 |
| Gender (female) | -8.06 | -29.26 to 13.14 | 0.46 |
| Time of evolution of the disease in years | -0.14 | -0.52 to 0.25 | 0.48 |
| **Occupation**  Unemployed  Professional  Student  Teacher  Merchant  Administrative employee  Housewife  Craft  Others / retirees | 43.33  15.47  7.33  15.33  14.82  13.94  13.99  16.29  14.20 | 31.08 to 55.58  0.97 to 29.96  -20.06 to 34.73  -1.10 to 31.77  -2.17 to 31.81  -1.29 to 29.17  0.95 to 27.02  0.93 to 31.64  -0.93 to 29.53 | 0  0.04  0.60  0.07  0.09  0.07  0.04  0.04  0.07 |
| Xerophthalmia | -0.097 | -0.19 to -0.01 | 0.03 |
| Xerostomia | -0.16 | -0.24 to -0.07 | <0.01 |
| Xeroderma | -0.18 | -0.26 to -0.10 | <0.01 |
| Xerovagina | -0.09 | -0.16 to -0.02 | 0.02 |
| Fatigue | -0.25 | -0.33 to -0.18 | <0.01 |
| Parotid swealling | -0.02 | -7.17 to 7.12 | 0.995 |
| Arthralgia | -11.29 | -16.66 to -5.92 | <0.01 |
| Arthritis | -8.00 | -16.10 to 0.09 | 0.05 |
| Myalgias | -8.29 | -15.32 to -1.26 | 0.02 |
| Raynaud´s phenomenom | -1.58 | -9.39 to 6.24 | 0.69 |
| Polineuropathy | -4.67 | -14.83 to 5.49 | 0.37 |
| Cutaneus vasculitis | -0.51 | -16.79 to 15.77 | 0.95 |
| Pulmonary manifestations | 2.30 | -8.55 to 13.15 | 0.68 |
| Renal manifestations | 21.17 | 7.00 to 35.33 | <0.01 |
| Anemia of chronic disease | 4.29 | -5.37 to 13.96 | 0.38 |
| Neutropenia | -5.06 | -47.42 to 37.30 | 0.81 |
| Lymphoma | -9.18 | -51.35 to 33.00 | 0.67 |
| Fibromyalgia | -18.75 | -25.01 to -12.48 | <0.01 |
| Osteoarthritis | -6.44 | -12.24 to -0.65 | 0.03 |
| Tobacco | 4.64 | -1.36 to 10.65 | 0.13 |
| High blood pressure | -2.18 | -7.85 to 3.49 | 0.50 |
| Artificial tears | -4.04 | -12.41 to 4.33 | 0.34 |
| Ophthalmic gel | 1.39 | -3.97 to 6.75 | 0.61 |
| Saliva substitute | -1.84 | -8.41 to 4.73 | 0.58 |
| Secretagogues | -0.34 | -7.40 to 6.73 | 0.93 |
| Hydroxychloroquine | 5.81 | 0.16 to 11.47 | 0.04 |
| Immunosuppressants | 2.32 | -5.20 to 9.83 | 0.54 |
| Depression  Absent  Mild  Moderate  Moderately severe  Severe | 73.82  -13.41  -26.19  -35.94  -41.38 | 70.42 to 77.23  -18.64 to -8.18  -31.88 to -20.50  -42.14 to -29.74  -49.28 to -33.48 | <0.01  <0.01  <0.01  <0.01  <0.01 |
| Anxiety  Absent  Mild  Moderate  Severe | 73.41  -16.44  -28.16  -39.71 | 70.07 to 76.76  -21.42 to -11.46  -33.73 to -22.59  -46.04 to -33.39 | <0.01  <0.01  <0.01  <0.01 |
| Physical activity | 0.00008 | -5.5506 to 0.0002 | 0.07 |

**TABLE S7.** **PHYSICAL FUNCTION: BIVARIATE ANALYSIS**

| **PHYSICAL FUNCTION** | ***β* coefficient** | **95% CI** | ***p value*** |
| --- | --- | --- | --- |
| Age | -0.40 | -0.65 to -0.14 | <0.01 |
| Gender (female) | -14.94 | -38.49 to 8.59 | 0.21 |
| Time of evolution of the disease in years | -0.52 | -0.92 to -0.12 | 0.01 |
| **Occupation**  Unemployed  Professional  Student  Teacher  Merchant  Administrative employee  Housewife  Craft  Others / retirees | 41.92  31.30  44.74  33.08  31.92  24.82  22.59  14.98  11.71 | 27.69 to 56.16  14.41 to 48.19  28.78 to 60.71  16.38 to 49.78  12.17 to 51.68  4.79 to 44.84  7.44 to 37.74  -3.72 to 33.68  -6.08 to 29.50 | <0.01  <0.01  <0.01  <0.10  <0.01  0.02  <0.01  0.12  0.20 |
| Xerophthalmia | -0.17 | -0.27 to -0.06 | <0.01 |
| Xerostomia | -0.24 | -0.33 to -0.14 | <0.01 |
| Xeroderma | -0.28 | -0.38 to -0.18 | <0.01 |
| Xerovagina | -0.11 | -0.20 to -0.01 | 0.03 |
| Fatigue | -0.34 | -0.43 to -0.24 | <0.01 |
| Parotid swealling | 3.55 | -5.10 to 12.20 | 0.42 |
| Arthralgia | -10.34 | -17.18 to -3.51 | <0.01 |
| Arthritis | -10.88 | -18.87 to -2.89 | <0.01 |
| Myalgias | -9.45 | -19.01 to 0.11 | 0.05 |
| Raynaud´s phenomenom | -2.99 | -13.311 to 7.33 | 0.57 |
| Polineuropathy | -8.39 | -20.56 to 3.78 | 0.18 |
| Cutaneus vasculitis | -1.63 | -15.08 to 11.83 | 0.81 |
| Pulmonary manifestations | -9.38 | -23.10 to 4.35 | 0.18 |
| Renal manifestations | 15.48 | 5.30 to 25.66 | <0.01 |
| Anemia of chronic disease | -4.35 | -16.61 to 7.91 | 0.49 |
| Neutropenia | 15.22 | 11.74 to 18.69 | <0.01 |
| Lymphoma | -14.74 | -18.23 to -11.26 | <0.01 |
| Fibromyalgia | -24.12 | -31.92 to -16.32 | <0.01 |
| Osteoarthritis | -11.00 | -17.83 to -4.18 | <0.01 |
| Tobacco | 3.48 | -3.90 to 10.87 | 0.35 |
| High blood pressure | -11.42 | -18.14 to -4.71 | <0.01 |
| Artificial tears | -5.44 | -15.57 to 4.70 | 0.29 |
| Ophthalmic gel | -4.20 | -11.07 to 2.68 | 0.23 |
| Saliva substitute | -11.58 | -19.92 to -3.24 | <0.01 |
| Secretagogues | 3.16 | -5.36 to 11.67 | 0.47 |
| Hydroxychloroquine | 9.79 | 2.77 to 16.82 | <0.01 |
| Immunosuppressants | -5.96 | -14.42 to 2.50 | 0.17 |
| Depression  Absent  Mild  Moderate  Moderately severe  Severe | 80.77  -11.89  -25.57  -29.66  -45.77 | 75.82 to 85.72  -19.00 to -4.78  -34.32 to -16.81  -38.65 to -20.66  -59.63 to -31.91 | <0.01  <0.01  <0.01  <0.01  <0.01 |
| Anxiety  Absent  Mild  Moderate  Severe | 76.65  -16.37  -19.55  -19.70 | 71.20 to 82.09  -24.39 to -8.34  -28.39 to -10.70  -29.87 to -9.54 | <0.01  <0.01  <0.01  <0.01 |
| Physical activity | 0.00009 | 0.00005 to 0.0001 | <0.01 |

**TABLE S8.** **EMOTIONAL ROLE: BIVARIATE ANALYSIS**

| **EMOTIONAL ROLE** | ***β* coefficient** | **95% CI** | ***p value*** |
| --- | --- | --- | --- |
| Age | -0.42 | -0.80 to -0.04 | 0.03 |
| Gender (female) | -6.89 | -50.07 to 36.29 | 0.74 |
| Time of evolution of the disease in years | -0.78 | -1.54 to -0.03 | 0.4 |
| **Occupation**  Unemployed  Professional  Student  Teacher  Merchant  Administrative employee  Housewife  Craft  Others / retirees | 33.33  25.81  33.33  24.44  28.21  23.19  12.77  30.30  18.18 | 9.63 to 57.04  -2.44 to 54.05  -21.41 to 88.08  -7.94 to 56.83  -5.32 to 61.73  -6.47 to 52.85  -12.53 to 38.06  0.40 to 60.20  -11.72 to 48.08 | <0.01  0.07  0.23  0.14  0.10  0.13  0.32  0.05  0.23 |
| Xerophthalmia | -0.27 | -0.44 to -0.09 | <0.01 |
| Xerostomia | -0.32 | -0.49 to -0.15 | <0.01 |
| Xeroderma | -0.41 | -0.57 to -0.24 | <0.01 |
| Xerovagina | -0.19 | -0.34 to -0.04 | 0.01 |
| Fatigue | -0.54 | -0.69 to -0.39 | <0.01 |
| Parotid swealling | -3.58 | -17.80 to 10.64 | 0.62 |
| Arthralgia | -13.63 | -24.65 to -2.60 | 0.02 |
| Arthritis | -20.97 | -36.65 to -5.28 | <0.01 |
| Myalgias | -20.84 | -34.86 to -6.82 | <0.01 |
| Raynaud´s phenomenom | -8.16 | -23.48 to 7.16 | 0.20 |
| Polineuropathy | -13.70 | -34.22 to 6.82 | 0.19 |
| Cutaneus vasculitis | -20.21 | -51.07 to 10.66 | 0.20 |
| Pulmonary manifestations | -7.97 | -29.97 to 14.04 | 0.48 |
| Renal manifestations | 10.28 | -18.93 to 39.50 | 0.50 |
| Anemia of chronic disease | -1.22 | -20.52 to 18.08 | 0.90 |
| Neutropenia | -52.99 | -138.86 to 32.87 | 0.23 |
| Lymphoma | -19.63 | -105.40 to 66.13 | 0.65 |
| Fibromyalgia | -33.87 | -46.70 to -21.03 | <0.01 |
| Osteoarthritis | -9.28 | -20.83 to 2.26 | 0.12 |
| Tobacco | 4.59 | -7.31 to 16.50 | 0.49 |
| High blood pressure | -11.82 | -22.90 to -0.74 | 0.04 |
| Artificial tears | -4.17 | -20.61 to 12.27 | 0.62 |
| Ophthalmic gel | -7.96 | -18.64 to 2.72 | 0.14 |
| Saliva substitute | -14.69 | -27.83 to -1.55 | 0.03 |
| Secretagogues | 0.97 | -13.28 to 15.22 | 0.89 |
| Hydroxychloroquine | 11.43 | 0.07 to 22.80 | 0.05 |
| Immunosuppressants | 2.39 | -12.34 to 17.11 | 0.75 |
| Depression  Absent  Mild  Moderate  Moderately severe  Severe | 85.23  -34.38  -46.46  -63.01  -81.53 | 77.53 to 92.94  -46.17 to -22.60  -58.91 to -34.00  -76.78 to -49.24  -99.42 to -63.64 | <0.01  <0.01  <0.01  <0.01  <0.01 |
| Anxiety  Absent  Mild  Moderate  Severe | 77.78  -30.36  -39.78  -57.41 | 69.71 to 85.85  -42.40 to -18.32  -53.13 to -26.42  -72.32 to -42.49 | <0.01  <0.01  <0.01  <0.01 |
| Physical activity | 0.00011 | -0.00006 to 0.0003 | 0.21 |
